# Supplementary material
Source: Springer Nature journal article supplement (https://www.springermedizin.de/resource/supplementary/12958_2011_914_MOESM1_ESM.PDF/9568806)
Supplement: MOESM1 [file 9568806]

**Supplementary Table 1. Clinical outcomes of patients with a clinical pregnancy.**

| <b>Patients who received a hysteroscopic biopsy-induced endometrium injury (N=6)</b> |                       |                          |                        |                      |
|--------------------------------------------------------------------------------------|-----------------------|--------------------------|------------------------|----------------------|
| Case No.                                                                             | Gestational age (wks) | Delivery mode            | Estimated fetal BW (g) | BW at birth (g)/ sex |
| 1                                                                                    | 34                    | C-section                |                        | 1995/F; 1978/F       |
| 2                                                                                    | 39                    | delivered                |                        | 3335/F               |
| 3                                                                                    | 40                    | C-section                |                        | 2930/M               |
| 4                                                                                    | 39                    | delivered                |                        | 2800/F               |
| 5                                                                                    | 37                    | delivered                |                        | 2750/F               |
| 6                                                                                    | 33                    | ongoing                  | 1650/F;1950/M          |                      |
| <b>Control patients who achieved clinical pregnancy (N=11)</b>                       |                       |                          |                        |                      |
| Case No.                                                                             | Gestational age (wks) | Delivery mode            | Estimated fetal BW (g) | BW at birth (g)/ sex |
| 1                                                                                    | 39                    | delivered                |                        | 3620/M               |
| 2                                                                                    | 34                    | delivered                |                        | 2045/F; 2160/F       |
| 3                                                                                    | —                     | lost follow-up at 14-wks |                        |                      |
| 4                                                                                    | —                     | lost follow-up at 13-wks |                        |                      |
| 5                                                                                    | —                     | <b>aborted at 8-wks</b>  |                        |                      |
| 6                                                                                    | —                     | lost follow-up at 12-wks |                        |                      |
| 7                                                                                    | —                     | <b>aborted at 5-wks</b>  |                        |                      |
| 8                                                                                    | 39                    | delivered                |                        | 2915/M               |
| 9                                                                                    | 36                    | C-section                |                        | 2945/M; 2775/M       |
| 10                                                                                   | 39                    | delivered                |                        | 3700/F               |
| 11                                                                                   | —                     | <b>aborted at 6-wks</b>  |                        |                      |
